# Supplementary material
Source: Elsevier journal article supplement (https://www.sciencedirect.com/science/article/pii/S0300893216301865)
Supplement: mmc1 [file mmc1.pdf]

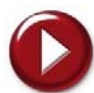

## Material suplementario

---

### **La calidad en la presentación de métodos y resultados de los análisis de coste efectividad de intervenciones cardiovasculares**

Manuel Ridaó <sup>a,b</sup> y Ferrán Catalá-López <sup>c e,\*</sup>

<sup>a</sup>*Instituto Aragonés de Ciencias de la Salud (I+CS), Red de Investigación en Servicios de Salud en Enfermedades Crónicas (REDISSEC), Zaragoza, España*

<sup>b</sup>*Fundación para el Fomento de la Investigación Sanitaria y Biomédica de la Comunitat Valenciana (FISABIO)-Salud Pública, Valencia, España*

<sup>c</sup>*Departamento de Medicina, Universidad de Valencia/Instituto de Investigación Sanitaria INCLIVA y CIBERSAM, Valencia, España*

<sup>d</sup>*Clinical Epidemiology Program, Ottawa Hospital Research Institute (OHRI), Ottawa, Ontario, Canadá*

<sup>e</sup>*Fundación Instituto de Investigación en Servicios de Salud, Valencia, España*

---

**Figura material suplementario.** Evolución temporal de la publicación de análisis de coste-efectividad de intervenciones cardiovasculares realizados en España (n = 47).

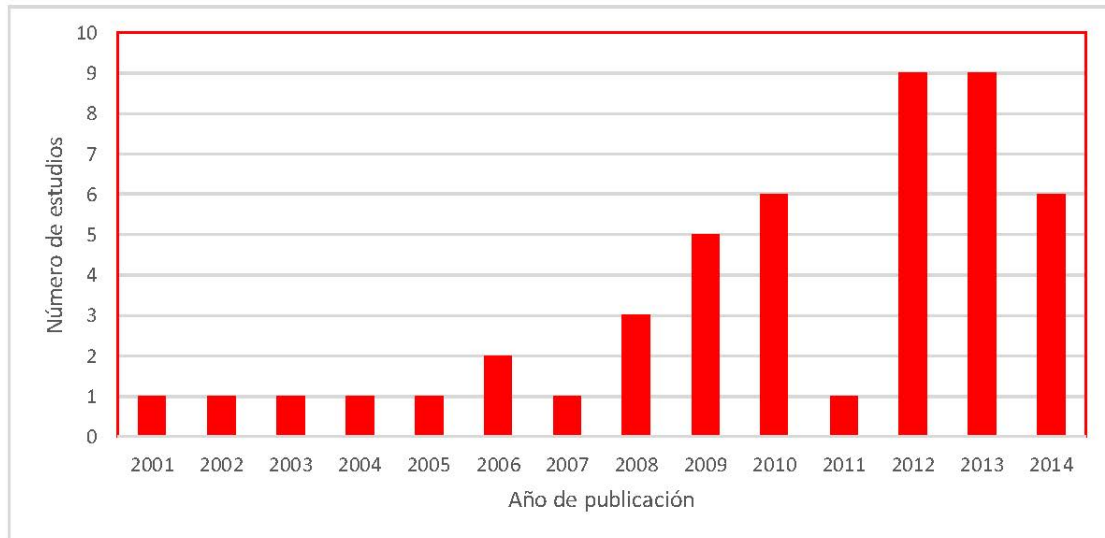

**Tabla material suplementario**

Características descriptivas de los análisis de coste-efectividad de intervenciones cardiovasculares en España (n = 47)

| Categoría | Característica                                                                                | n (%)     |
|-----------|-----------------------------------------------------------------------------------------------|-----------|
| Título    | <b>Identificación</b>                                                                         |           |
|           | Términos específicos «coste-efectividad» o «coste-utilidad» en el título                      | 37 (78,7) |
| Objetivo  | <b>Pregunta de investigación</b>                                                              |           |
|           | Presentación clara de la pregunta de investigación y su relevancia para la toma de decisiones | 40 (85,1) |
| Métodos   | <b>Protocolo</b>                                                                              |           |
|           | Existencia de protocolo del estudio (o métodos establecidos <i>a priori</i> )                 | 2 (4,3)   |
|           | <b>Tipología del estudio</b>                                                                  |           |
|           | <i>Basado en modelizaciones</i>                                                               | 43 (91,5) |
|           | Determinístico/árbol de decisiones                                                            | 3 (6,4)   |
|           | Modelo de Markov                                                                              | 33 (70,2) |
|           | Simulación de eventos discretos                                                               | 4 (8,5)   |
|           | Otro (o desconocido)                                                                          | 3 (6,4)   |
|           | <i>No basado en modelizaciones</i>                                                            | 4 (8,5)   |
|           | Estudio observacional                                                                         | 3 (6,4)   |
|           | Ensayo clínico aleatorizado y controlado                                                      | 1 (2,1)   |
|           | <b>Población</b>                                                                              |           |
|           | Presenta el número de participantes incluidos (o simulados)                                   | 31 (66)   |
|           | Descripción adecuada de las características basales de la población                           | 21 (44,7) |
|           | Adultos                                                                                       | 21 (44,7) |
|           | No se presenta o discute                                                                      | 26 (55,3) |
|           | <b>Tipo de intervenciones</b>                                                                 |           |
|           | Medicamentos                                                                                  | 30 (63,8) |
|           | Dispositivos y procedimientos                                                                 | 10 (21,3) |

|  |                                                                                        |           |
|--|----------------------------------------------------------------------------------------|-----------|
|  | Cribado                                                                                | 2 (4,3)   |
|  | Cirugía                                                                                | 5 (10,6)  |
|  | <b>Tipo de comparador(es)</b>                                                          |           |
|  | Alternativa activa                                                                     | 24 (51,1) |
|  | Práctica habitual/estándar                                                             | 14 (29,8) |
|  | Placebo o no hacer nada                                                                | 9 (19,1)  |
|  | <b>Descripción adecuada de las intervenciones y de los comparadores</b>                | 38 (80,9) |
|  | <b>Presentación de la perspectiva del análisis</b>                                     | 43 (91,5) |
|  | Sistema sanitario                                                                      | 38 (80,9) |
|  | Sistema sanitario y sociedad                                                           | 3 (6,4)   |
|  | Sociedad                                                                               | 1 (2,1)   |
|  | Hospital                                                                               | 1 (2,1)   |
|  | <b>Horizonte temporal</b>                                                              |           |
|  | Corto plazo                                                                            | 8 (17)    |
|  | Largo plazo (> 1 año)                                                                  | 39 (83)   |
|  | <b>Se presenta el diagrama del modelo y/o el flujo de pacientes en una figura</b>      | 43 (91,5) |
|  | <b>Se discuten supuestos/presunciones</b>                                              | 37 (78,7) |
|  | <b>Se discute la validación del modelo (cuando aplique)</b>                            | 24 (55,8) |
|  | <b>Se dan razones para la elección del modelo (cuando aplique)</b>                     | 23 (53,5) |
|  | <b>Medidas de eficacia/efectividad</b>                                                 |           |
|  | Basadas en un único estudio                                                            | 21 (44,7) |
|  | Basadas en la síntesis de la evidencia (p. ej., revisiones sistemáticas y metanálisis) | 9 (19,1)  |
|  | <b>Descripción completa del cálculo de AVAC</b>                                        | 5 (10,6)  |
|  | <b>Se consideraron los daños/riesgos</b>                                               | 33 (70,2) |
|  | <b>Información sobre costes y recursos empleados</b>                                   |           |
|  | Fuente de información de costes                                                        | 46 (97,9) |
|  | Cantidad de recursos                                                                   | 26 (55,3) |
|  | Año de las unidades monetarias                                                         | 38 (80,9) |
|  | <b>Tipo de costes</b>                                                                  |           |
|  | Costes directos                                                                        | 47 (100)  |

|            |                                                                              |           |
|------------|------------------------------------------------------------------------------|-----------|
|            | Costes directos e indirectos                                                 | 4 (8,5)   |
|            | <b>Tasa de descuento para costes y AVAC</b>                                  | 36 (76,6) |
| Resultados | <b>Se presentan los costes netos</b>                                         | 42 (89,4) |
|            | <b>Se presentan los beneficios netos</b>                                     | 42 (89,4) |
|            | <b>Se presenta la razón de coste-efectividad incremental</b>                 | 45 (95,7) |
|            | <b>Intervalos de confianza (p. ej., IC95%)</b>                               | 6 (12,8)  |
|            | <b>Plano coste-efectividad</b>                                               | 26 (55,3) |
|            | <b>Curva de aceptabilidad</b>                                                | 22 (46,8) |
|            | <b>Se presentan análisis de sensibilidad</b>                                 | 43 (91,5) |
|            | Para costes                                                                  | 35 (74,5) |
|            | Para estimaciones de efectividad/eficacia                                    | 36 (76,6) |
|            | Para utilidades                                                              | 24 (51,1) |
|            | Para tasas de descuentos                                                     | 17 (36,2) |
|            | <b>Tipo de análisis de sensibilidad</b>                                      |           |
|            | Determinístico univariable                                                   | 9 (19,1)  |
|            | Determinístico multivariable                                                 | 0         |
|            | Probabilístico                                                               | 34 (72,3) |
|            | <b>Resultados para la variable principal en el análisis general</b>          |           |
|            | Más costes, más AVAC                                                         | 31 (66)   |
|            | Menos costes, más AVAC                                                       | 12 (25,5) |
|            | Menos costes, AVAC comparables                                               | 3 (6,4)   |
|            | Menos costes, menos AVAC                                                     | 1 (2,1)   |
| Discusión  | <b>Se discuten las limitaciones del estudio</b>                              | 44 (93,6) |
|            | <b>Los resultados se compararon con los de otras evaluaciones económicas</b> | 37 (78,7) |
|            | <b>Umbral hipotético de disposición a pagar</b>                              |           |
|            | < 30.000 €/AVAC                                                              | 1 (2,1)   |
|            | 30.000 €/AVAC                                                                | 31 (66)   |
|            | > 30.000 €/AVAC-≤ 50.000 €/AVAC                                              | 4 (8,5)   |
|            | > 50.000 €/AVAC                                                              | 0         |
|            | No se presenta ni se discute                                                 | 11 (23,4) |
|            | <b>Conclusiones del estudio</b>                                              |           |
|            | Favorables                                                                   | 42 (89,4) |

|       |                                                               |           |
|-------|---------------------------------------------------------------|-----------|
|       | Desfavorables                                                 | 2 (4,3)   |
|       | Neutras                                                       | 3 (6,4)   |
| Otros | <b>Se presenta fuente de financiación</b>                     | 35 (74,5) |
|       | Privada                                                       | 27 (57,4) |
|       | Pública                                                       | 7 (14,9)  |
|       | Ninguna/no se presenta                                        | 13 (27,7) |
|       | <b>Se presenta declaración de conflicto de intereses</b>      | 30 (63,8) |
|       | Con conflicto de intereses                                    | 21 (44,7) |
|       | Sin conflicto de intereses                                    | 9 (19,1)  |
|       | <b>Se presenta la contribución de cada uno de los autores</b> | 10 (21,3) |

AVAC: años de vida ajustados por calidad; IC95%: intervalo de confianza del 95%.
